# Supplementary material for: Continuation of long-term global SO 2 pollution monitoring from OMI to OMPS
Source: Copernicus journal article supplement (doi:10.5194/amt-10-1495-2017), 2017-04-20
Supplement: Supplementary file 1 [file amt-10-1495-2017-supplement.pdf]

Supplement of Atmos. Meas. Tech., 10, 1495–1509, 2017  
<http://www.atmos-meas-tech.net/10/1495/2017/>  
doi:10.5194/amt-10-1495-2017-supplement  
© Author(s) 2017. CC Attribution 3.0 License.

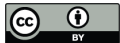

*Supplement of*

## **Continuation of long-term global SO<sub>2</sub> pollution monitoring from OMI to OMPS**

**Yan Zhang et al.**

*Correspondence to:* Yan Zhang ([yan.zhang@nasa.gov](mailto:yan.zhang@nasa.gov))

The copyright of individual parts of the supplement might differ from the CC-BY 3.0 licence.

# Supplemental Information

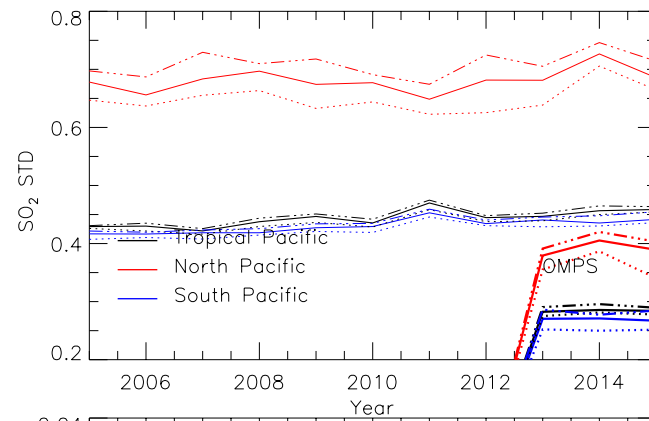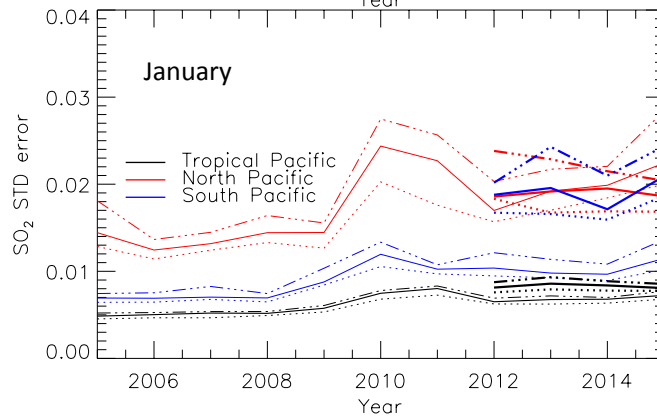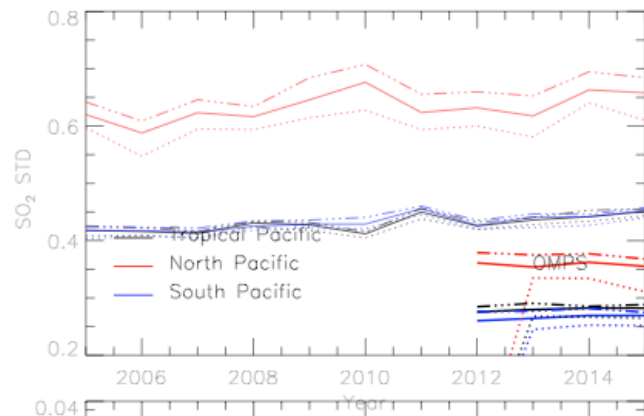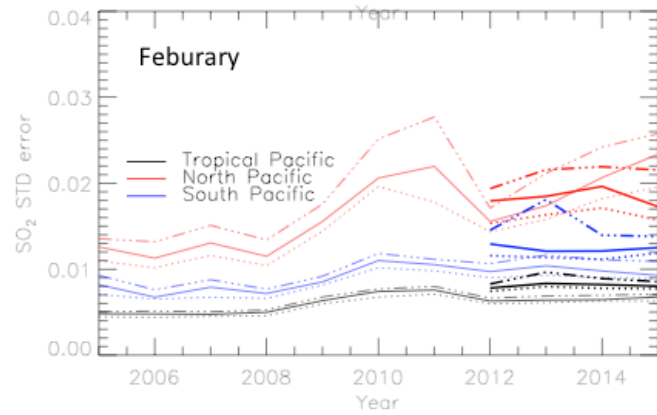

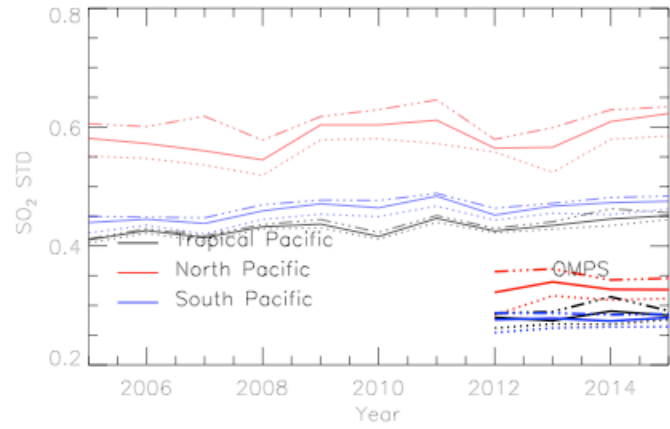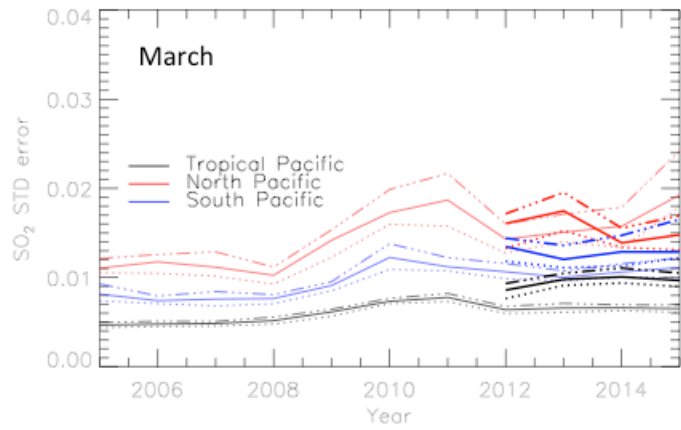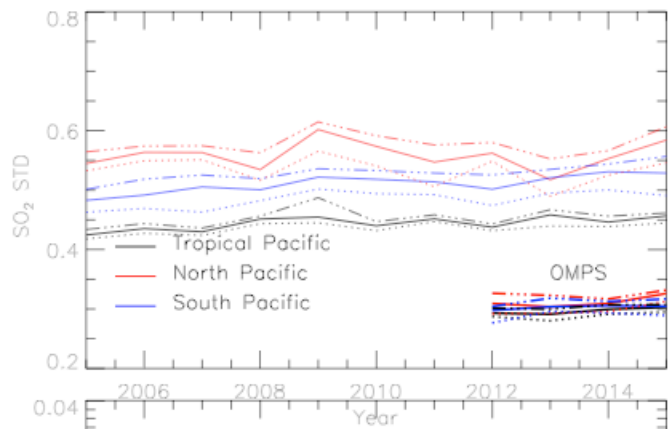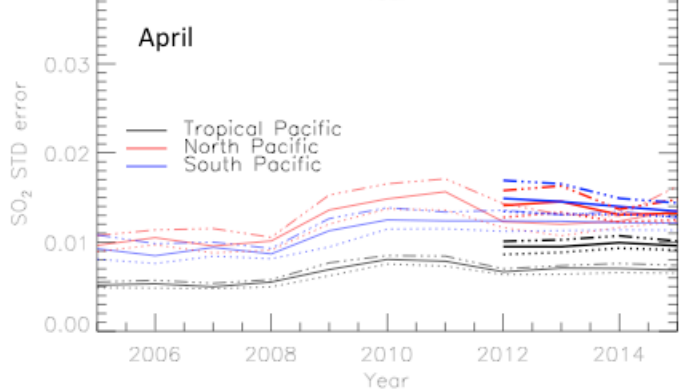

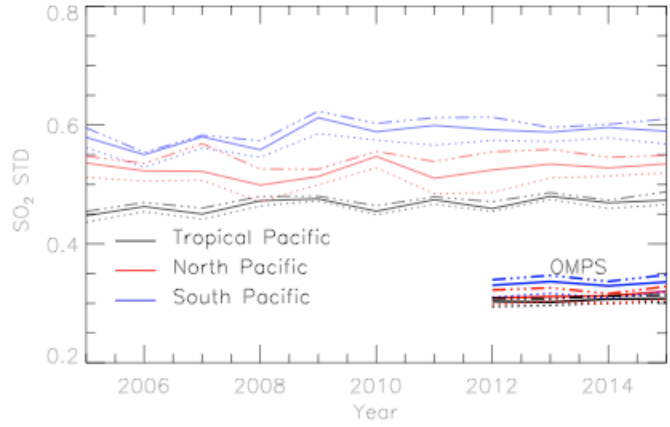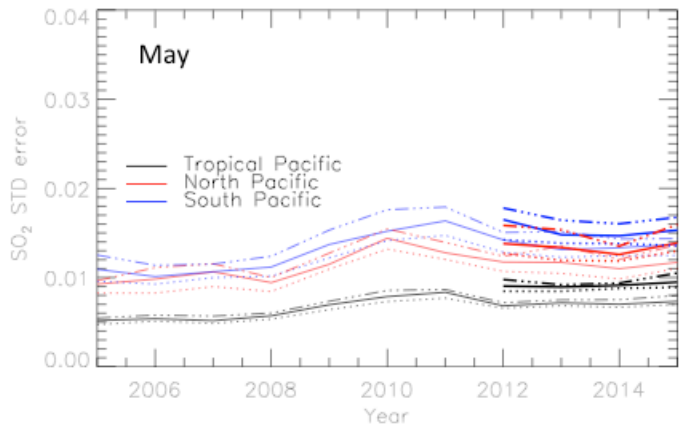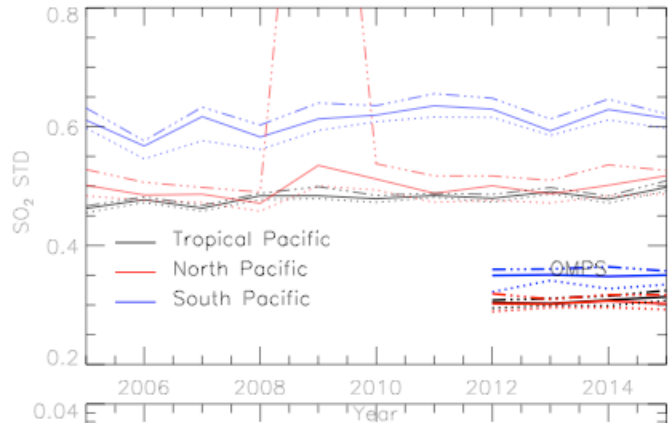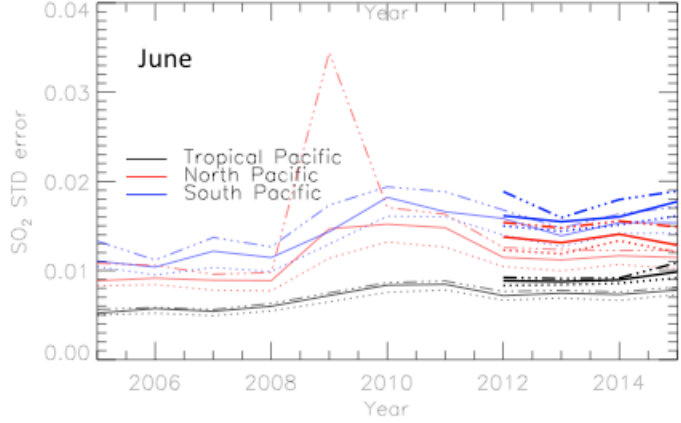

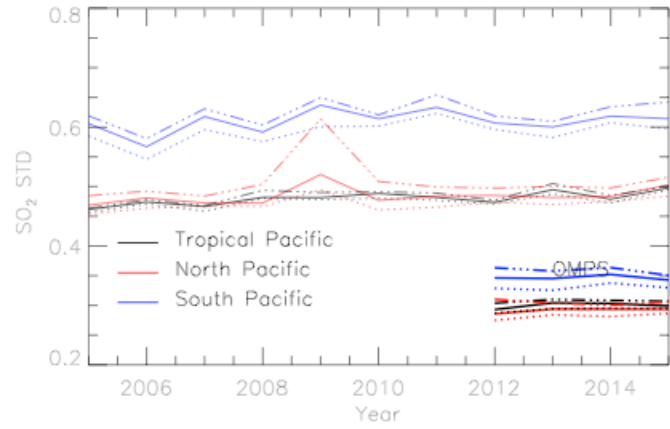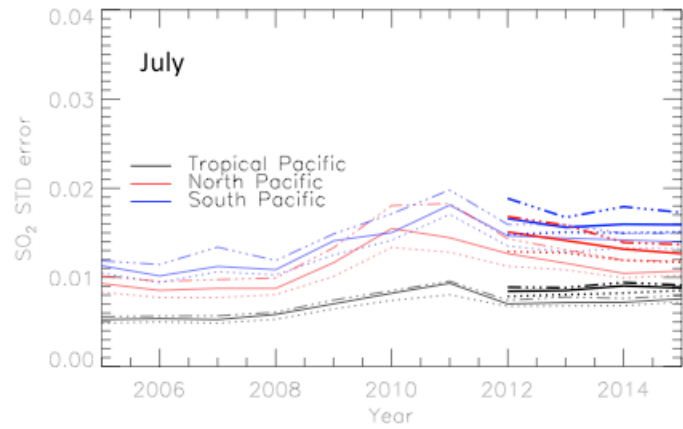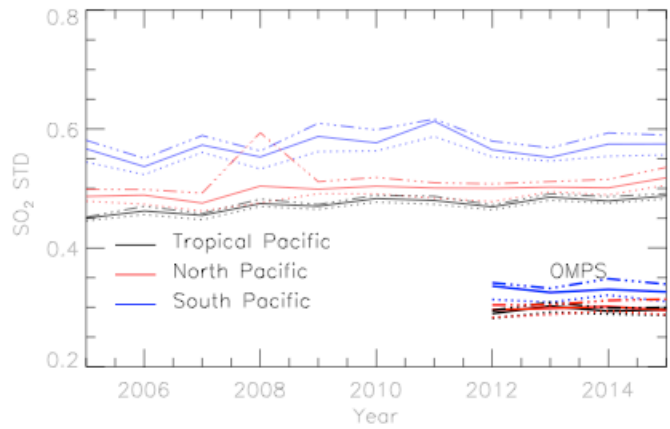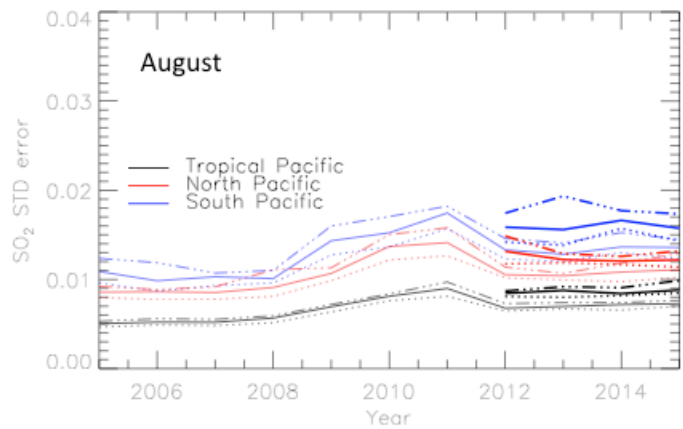

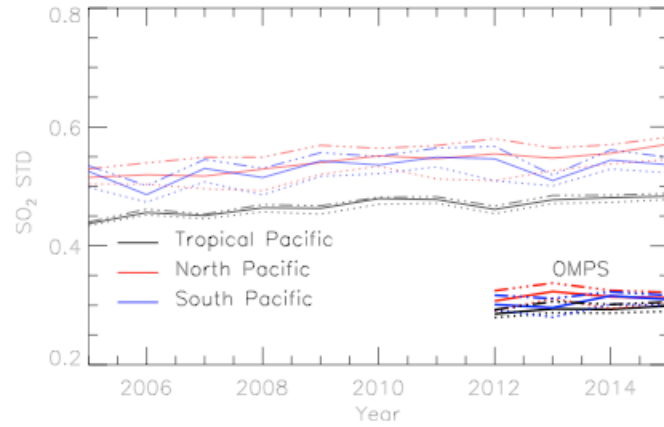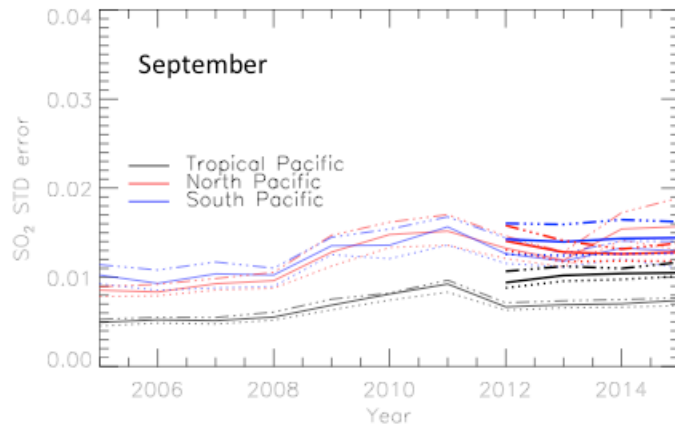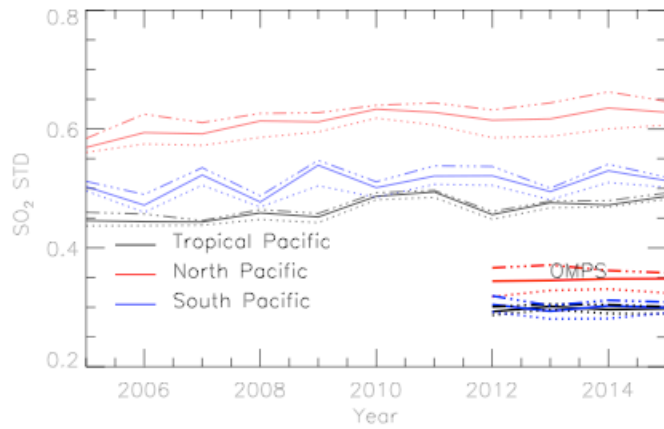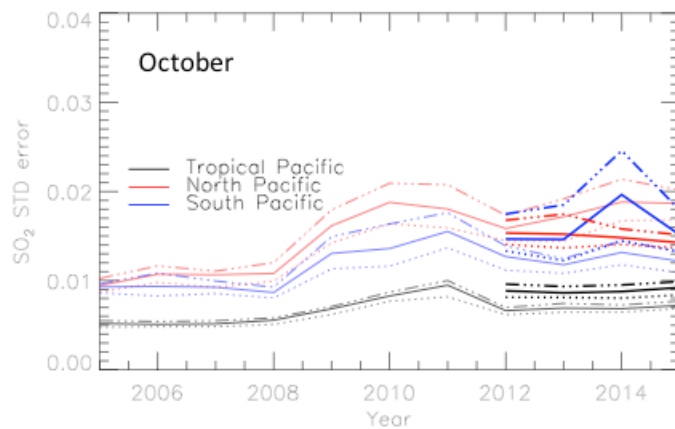

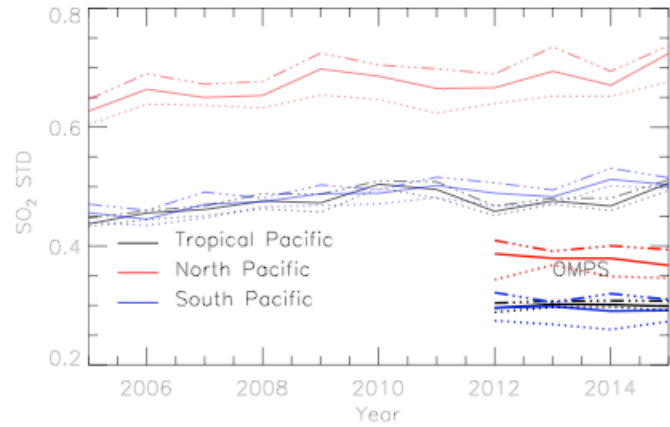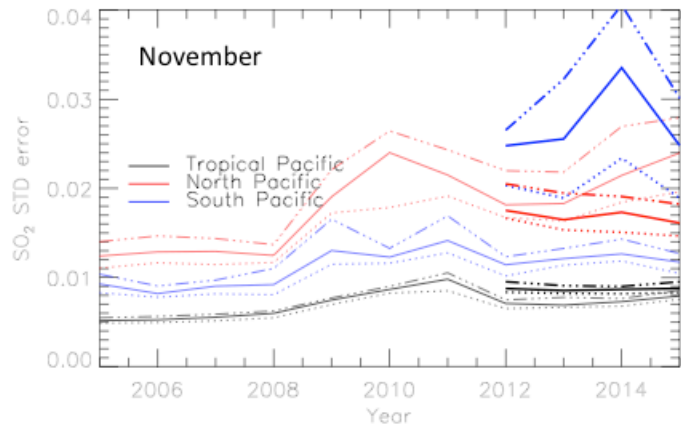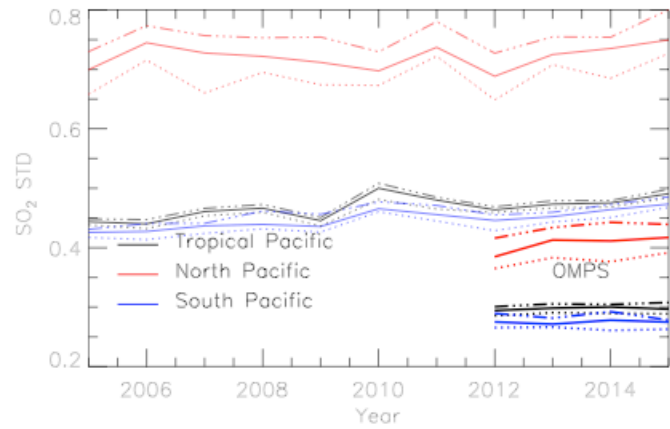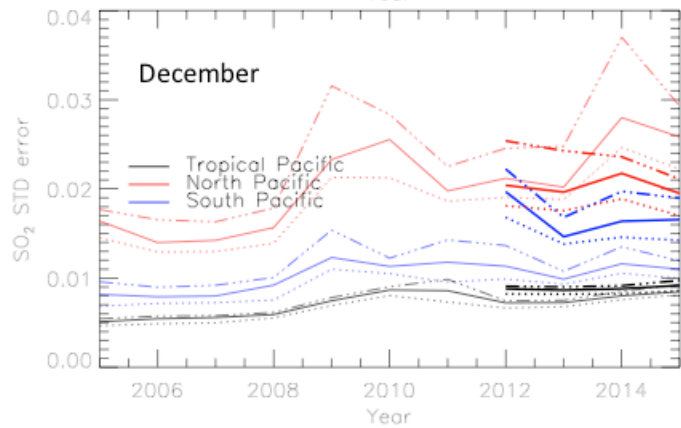

**Figure S1.** Standard deviation (STD, top) and Standard Error (STE, bottom) of SO<sub>2</sub> noise (DU) averaged over clean background regions in the Pacific (150°W-120°W), in the north between 30°N-42°N (Red), in tropics between 10°S-10°N (black), and in the south between 30°S-20°S (blue) in Jan.-Dec. of each year from 2005 to 2015. Solid lines are medians of daily SO<sub>2</sub> STD from each month, and dashed lines are 25% and 75% of daily SO<sub>2</sub> STD from each month, respectively. OMI data start in 2005 and OMPS data start in 2012.
